# Supplementary material for: Genomic analysis of early-stage lung cancer reveals a role for TP53 mutations in distant metastasis
Source: PubMed Central journal article supplement (PMC9646734; doi:10.1038/s41598-022-21448-1), 2022-11-09
Supplement: 41598_2022_21448_MOESM2_ESM.pdf [file 41598_2022_21448_MOESM2_ESM.pdf]

**SUPPLEMENTARY INFORMATION FOR Genomic analysis of early-stage lung cancer reveals a role for *TP53* mutations in distant metastasis**

Debra Van Egeren<sup>#</sup>, Khushi Kohli<sup>#</sup>, Jeremy L. Warner, Philippe L. Bedard, Gregory Riely, Eva Lepisto, Deborah Schrag, Michele LeNoue-Newton, Paul Catalano, Kenneth L. Kehl, and Franziska Michor<sup>\*</sup>, for the AACR Project GENIE Consortium

| Demographic Profile           | Number of Patients (n) | Percentage of Patients (%) |
|-------------------------------|------------------------|----------------------------|
| <b>Sex</b>                    |                        |                            |
| Female                        | 573                    | 55.42%                     |
| Male                          | 461                    | 44.58%                     |
| <b>Race</b>                   |                        |                            |
| White                         | 866                    | 83.75%                     |
| Black                         | 52                     | 5.03%                      |
| Chinese                       | 46                     | 4.45%                      |
| Other                         | 20                     | 1.93%                      |
| Unknown                       | 30                     | 2.90%                      |
| <b>Age</b>                    |                        |                            |
| 18-59                         | 273                    | 26.40%                     |
| 60+                           | 761                    | 73.60%                     |
| <b>Smoking History</b>        |                        |                            |
| Has Smoking History           | 791                    | 76.50%                     |
| No Smoking History            | 243                    | 23.50%                     |
| <b>Ethnicity</b>              |                        |                            |
| Non-Spanish; non-Hispanic     | 997                    | 96.42%                     |
| Spanish or Hispanic or Latino | 37                     | 3.58%                      |
| <b>Mutation Status</b>        |                        |                            |
| <i>TP53</i> mutant            | 357                    | 34.53%                     |
| <i>KRAS</i> mutant            | 249                    | 24.08%                     |
| <i>EGFR</i> mutant            | 90                     | 8.70%                      |
| <i>BRAF</i> mutant            | 46                     | 4.45%                      |
| <i>PIK3CA</i> mutant          | 46                     | 4.45%                      |
| <b>CNA status</b>             |                        |                            |
| <i>EGFR</i> amplified         | 73                     | 7.06%                      |
| <i>PIK3CA</i> amplified       | 55                     | 5.32%                      |
| <i>MET</i> amplified          | 50                     | 4.84%                      |
| <i>KRAS</i> amplified         | 39                     | 3.77%                      |
| <i>FGFR1</i> amplified        | 38                     | 3.68%                      |
| <b>Stage at Diagnosis</b>     |                        |                            |
| Stage I                       | 419                    | 40.52%                     |
| Stage II                      | 133                    | 12.86%                     |
| Stage III                     | 189                    | 18.28%                     |
| Stage IV                      | 273                    | 26.40%                     |
| Unknown                       | 20                     | 1.93%                      |

**Supplementary Table 1. Clinical, demographic, and genomic characteristics of the 1034 NSCLC patients used in this study.** Patients diagnosed at stages I-III were used to assess the impact of genomic factors on the risk of developing new metastases, while patients diagnosed at any stage were used to determine where in the *TP53* gene mutations occurred in NSCLC patients.

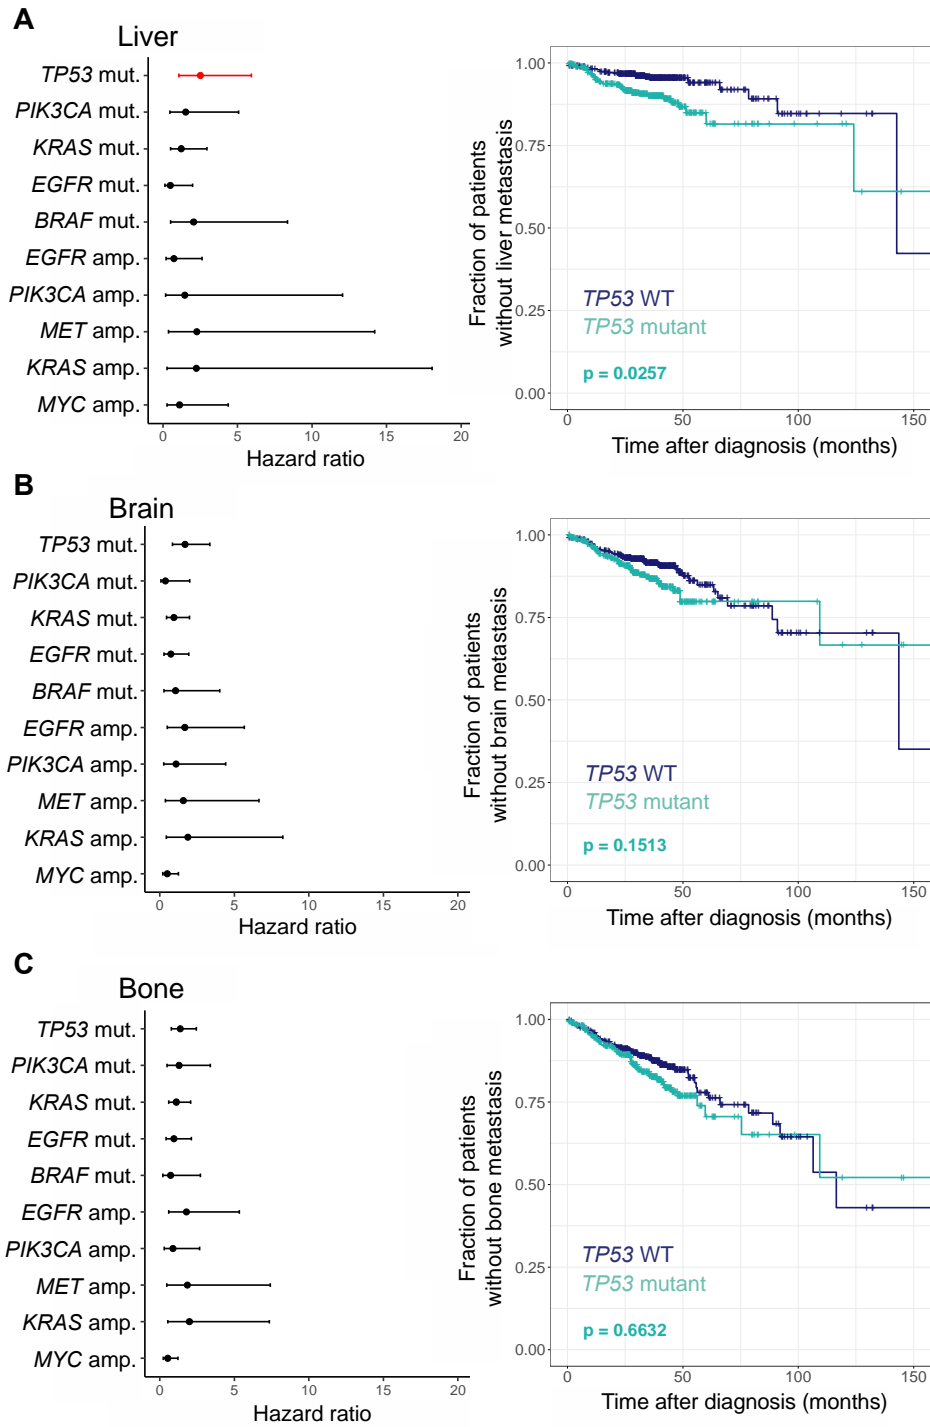

**Supplementary Figure 1. *TP53* mutations are significantly associated with the development of distant liver metastases after diagnosis in NSCLC, but not brain or bone metastases. A-C.** Left: forest plots depict the Cox regression hazard ratio of each mutation analyzed for liver, brain, and bone metastases, respectively. Significant results ( $\alpha=0.05$ ) are shown in red. Error bars are Bonferroni-adjusted 95% confidence intervals. Right: Kaplan-Meier plots depict the probability of developing new liver, brain, and bone metastases, respectively, stratified by *TP53* mutation status. The shaded regions shown in the Kaplan-Meier plots denote 95% confidence intervals. P-values denote the significance of each Cox hazard ratio.

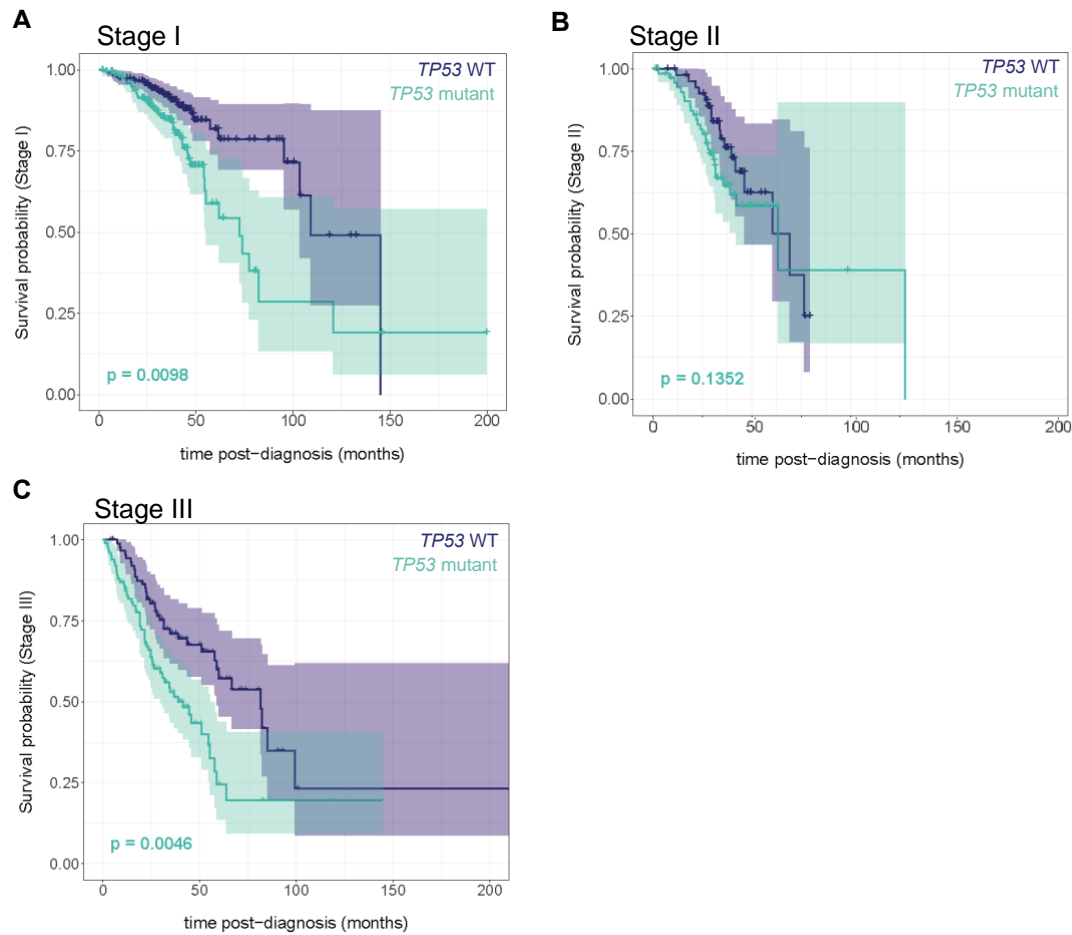

**Supplementary Figure 2. *TP53* mutations are negatively associated with survival, particularly in early-stage patients.** A-C. Kaplan-Meier curves showing NSCLC survival probability stratified by *TP53* mutation for patients diagnosed with Stage I, II, and III NSCLC, respectively. Colors for all panels denote primary tumor *TP53* mutation status (dark blue: *TP53* mutant, teal: *TP53* WT). Shaded regions denote 95% confidence intervals.
